# Supplementary material for: Dissolvable metallohydrogels for controlled release: evidence of a kinetic supramolecular gel phase intermediate
Source: Royal Society of Chemistry journal article supplement (doi:10.1039/c4cc02771j), 2014-01-01
Supplement: c4cc02771j1.pdf [file c4cc02771j1.pdf]

## Supporting Information

### Dissolvable Metallohydrogels for Controlled Release: Evidence of a Kinetic Supramolecular Gel Intermediate

*Subhadeep Saha, Jürgen Bachl, Tanay Kundu, David Díaz Díaz\* and Rahul Banerjee\**

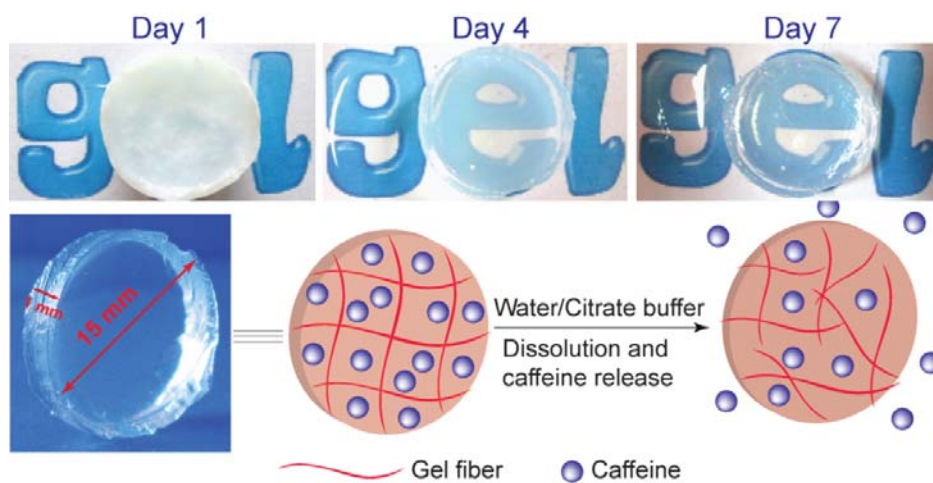

## Contents List

|                                         | page |
|-----------------------------------------|------|
| S1. Preparation of ligands and gel..... | 3    |
| S2. Viscoelastic properties .....       | 3    |
| S3. Thermogravimetric analyses .....    | 5    |
| S4. PXRD spectra .....                  | 6    |
| S5. IR spectra.....                     | 7    |
| S6. Multiresponsive nature .....        | 8    |
| S7. MALDI-TOF spectra .....             | 9    |
| S8. TEM images .....                    | 10   |

## S1. Preparation of ligands and gel

**Preparation of amino acid based ligand:** The ligand system VA was prepared following a modified literature procedure. To an aqueous solution (8 mL) of L-valine (1g, 8.5 mmol) and  $\text{Na}_2\text{CO}_3$  (0.46 g, 4.25 mmol), 4-pyridinecarboxaldehyde (0.92 g, 8.5 mmol) in MeOH (5 mL) was added slowly. The solution was stirred for 3 h and cooled in an ice bath.  $\text{NaBH}_4$  (0.38 g, 10.2 mmol) was added to the solution slowly. The mixture was stirred for 12 h, and 50% acetic acid (for the ligand L-VA) was used to neutralize the basic (pH~12) reaction mixture and adjust the pH to 7.1-7.2. As a result, in the reaction mixture sodium perchlorate/ sodium acetate (for perchloric acid and acetic acid, respectively) gets generated this eventually plays a very important role in the gelation process. The solution was stirred further for 1 h and then evaporated to dryness. The solid was extracted in hot and dry EtOH, and the filtrate was evaporated to get a white powder. L-VP has been prepared using same procedure. Yield (L-VA): 1.25g, 65%. The ligand has been crystallized from the aqueous solution Crystals were collected and utilized for its characterization. IR (KBr,  $\text{cm}^{-1}$ ):  $\nu_{\text{OH}}$ , 3421;  $\nu_{\text{as}}(\text{CO}_2)$ , 1562;  $\nu_{\text{s}}(\text{CO}_2)$ , 1409.  $^1\text{H}$  NMR ( $\text{D}_2\text{O}$ , ppm):  $-\text{CH}_3$  (1.21, *d*,  $J= 1.11$ , 3H),  $-\text{CH}_3$  (1.35, *d*,  $J= 1.1$ , 3H),  $-\text{CH}$  (3.20, *m*, 1H),  $-\text{HN}-\text{CH}$  (3.65, *m*, 1H),  $-\text{CH}_2$  (3.82, *dd*, 2H), *py-H* (7.34, *d*, 2H), *py-H* (8.38, *d*, 2H).

**Optimization of stock solution and preparation of hydrogels:** Figure 1 illustrates the synthesis of ZNVA and ZPVA hydrogels which forms upon mixing the aqueous solutions of the two components (0.5 mL each), *viz.* zinc nitrate hexahdrate (ZN, 0.2 M; for ZNVA)/ zinc perchlorate hexahdrate (ZP, 0.2 M; for ZPVA) and ligand system L-VA (derived from L-valine; 0.4 M), which turns into a gel within a few seconds at room temperature.

## S2. Viscoelastic properties

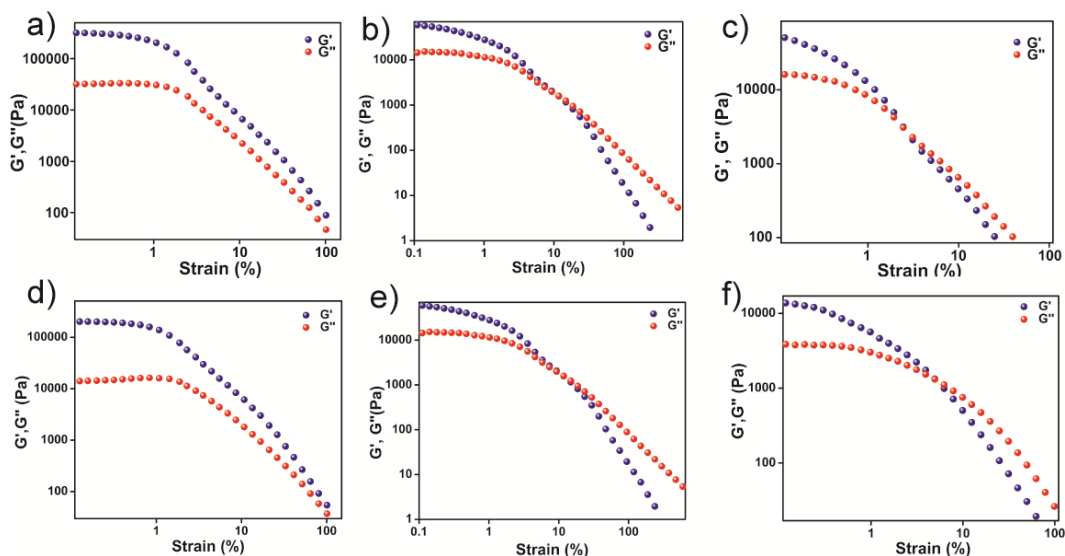

**Figure S1.** Oscillatory rheology of ZNVA and ZPVA hydrogels prepared at the CGC: DSS experiment at constant frequency of 1 Hz of a) of 6 h old, b) 3 days old and c) 7 days old ZNVA gel and c) 6 h old, b) 3 days old and c) 7 days old ZPVA gel.

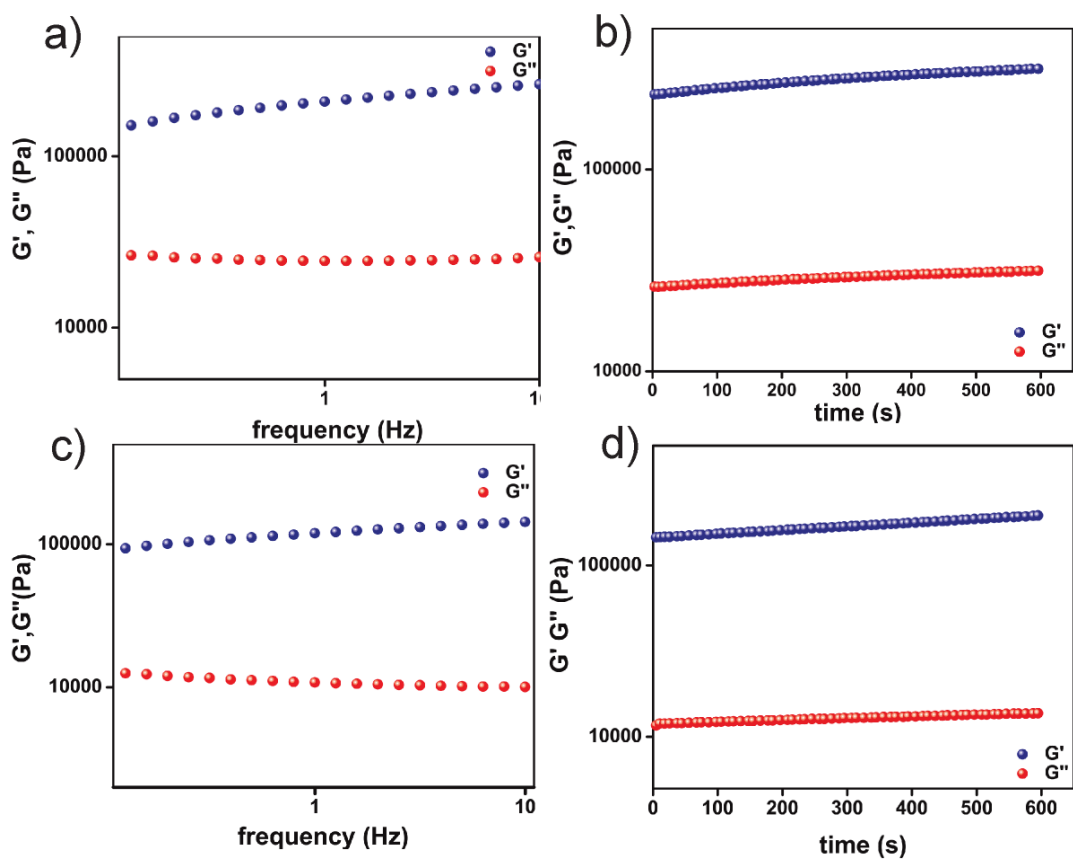

**Figure S2.** Oscillatory rheology of ZNVA and ZPVA hydrogels prepared at the CGC: Dynamic frequency sweep (DFS) experiment at constant strain of 0.1% of a) ZNVA and c) ZPVA hydrogel. b) and d) shows dynamic time sweep measurement at constant frequency of 1 Hz and constant strain of 0.1%.

### S3. Thermogravimetric analyses

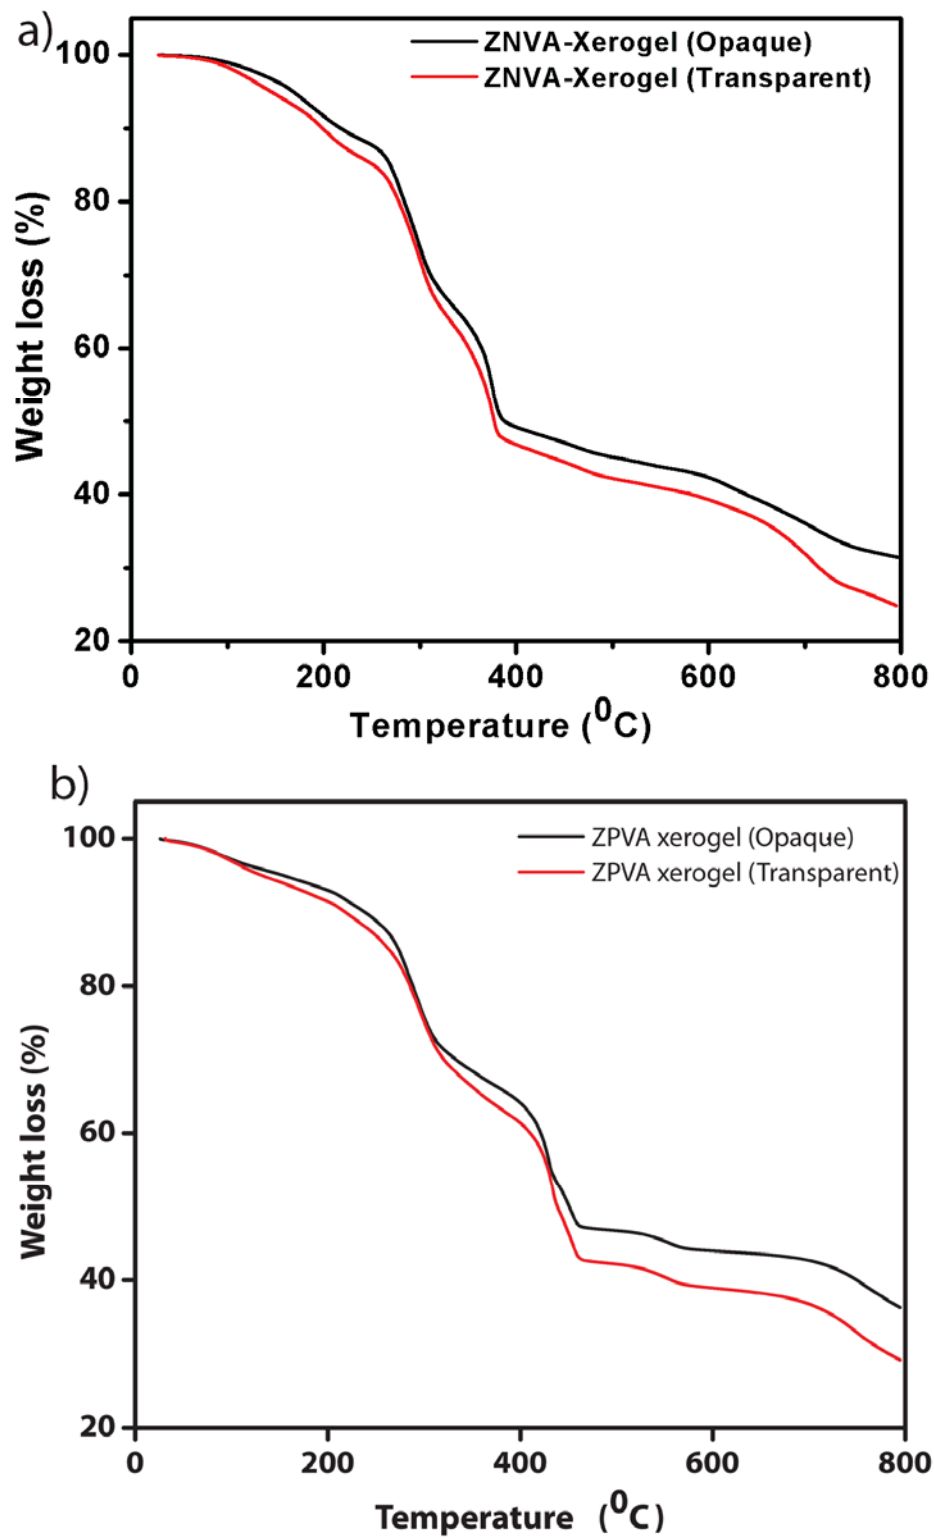

**Figure S3.** TGA traces for (a) ZNVA hydrogels and (b) ZPVA hydrogels (Black: Opaque and Red: Transparent gel).

#### S4. PXRD spectra

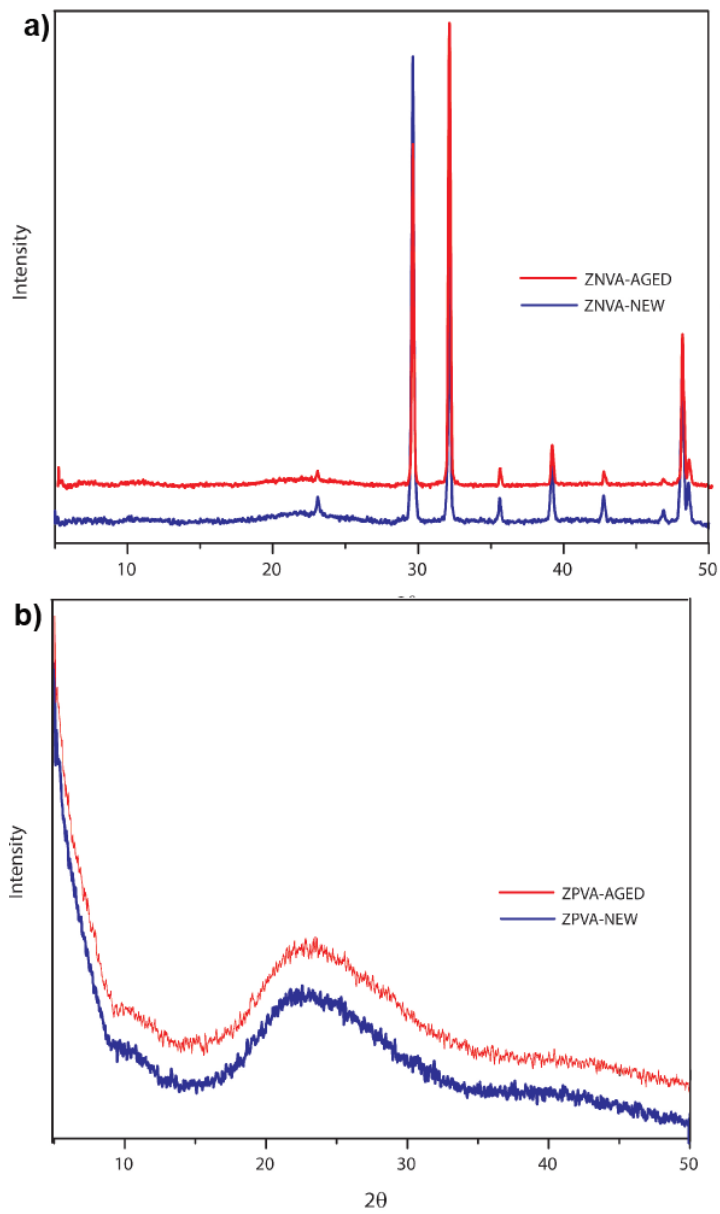

**Figure S4.** PXRD spectra for (a) ZNVA hydrogels and (b) ZPVA hydrogels (Blue: Opaque and Red: Transparent gel).

## S5. IR spectra

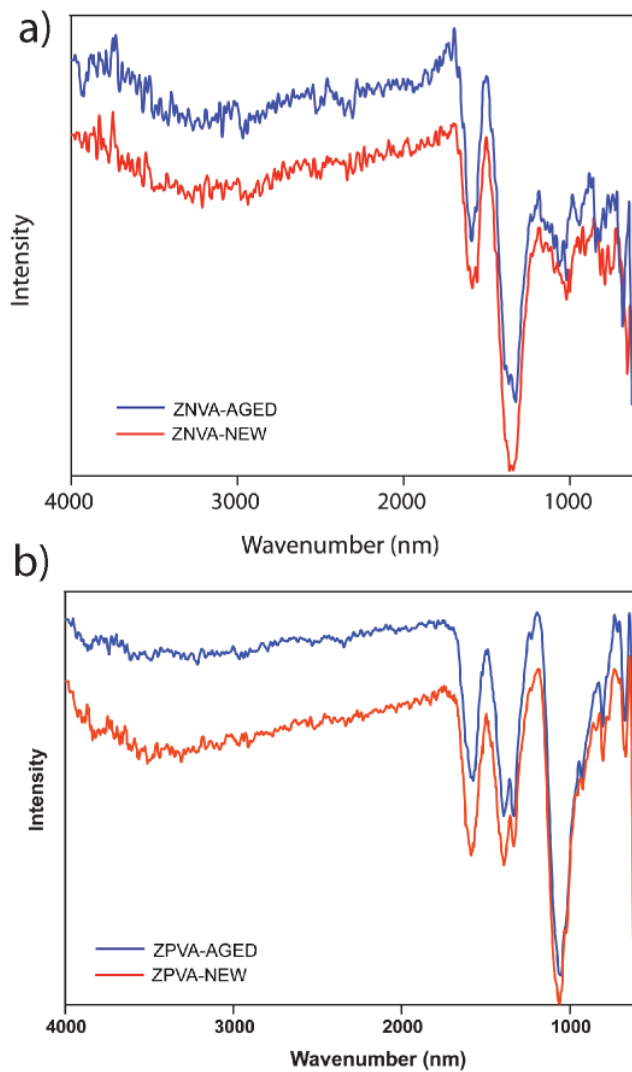

**Figure S5.** FTIR spectra for (a) ZNVA and (b) ZPVA hydrogels (Blue: Opaque and Red: Transparent gel).

**S6. Multiresponsive nature**

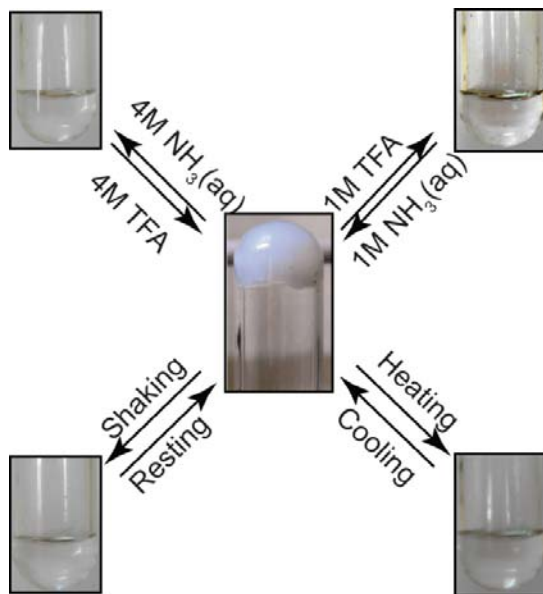

**Figure S6.** Multistimuli-responsive nature of ZNVA and ZPVA hydrogels.



## S7. MALDI-TOF spectra

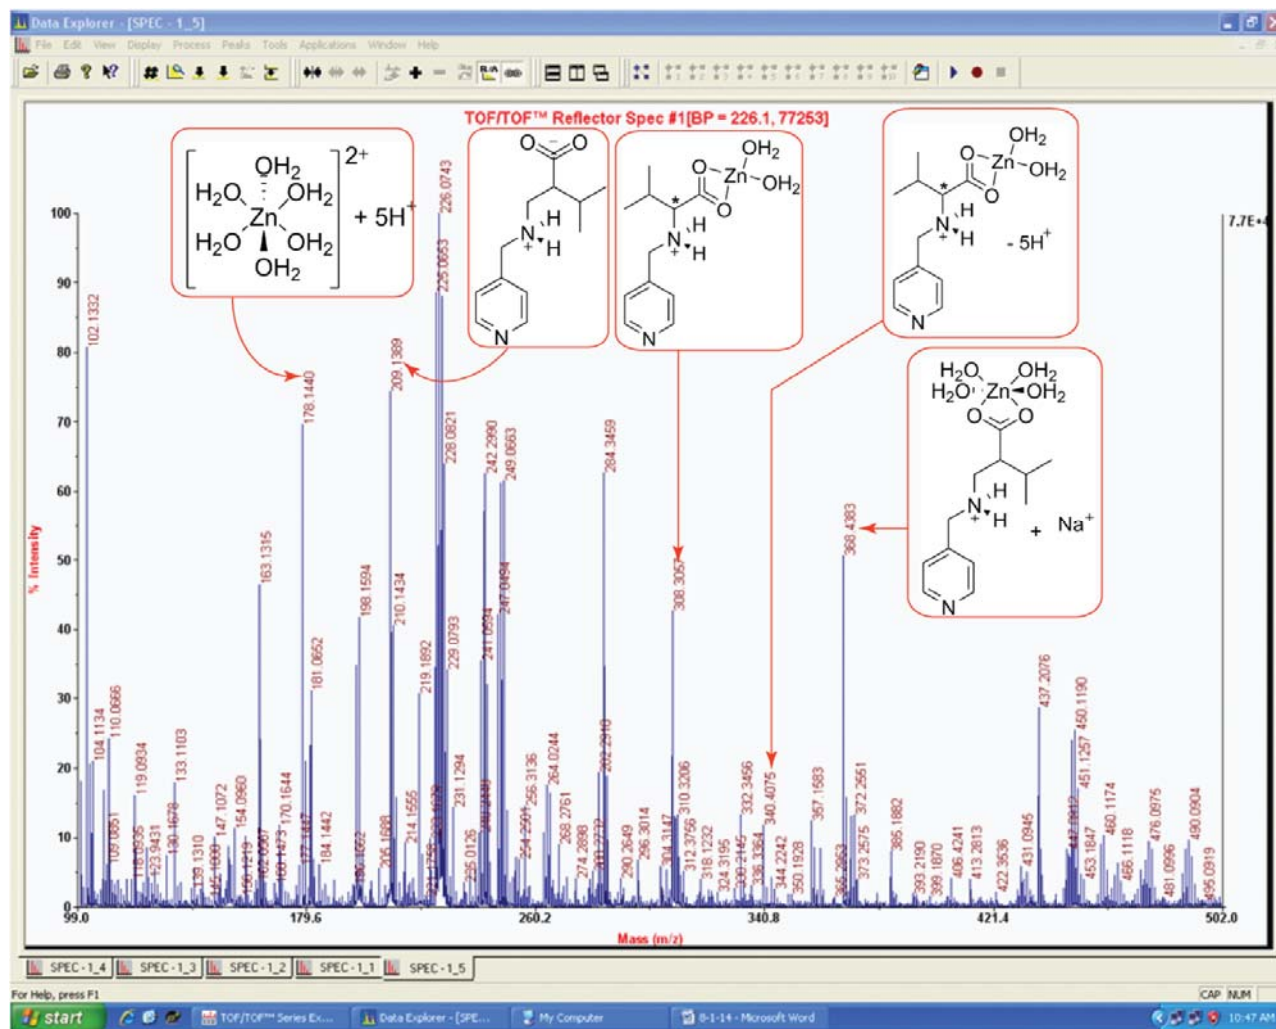

**Figure S7.** MALDI-TOF spectra and possible fragments for ZNVA hydrogel in dithranol matrix ( $m/z = 211, 225, 226$  and  $247$  denote dithranol matrix peaks;  $m/z = 178.1440$  and  $209.1369$  are from metal ion precursor and ligand;  $m/z = 340$  and  $368$  peaks corresponding to the gelator complex).

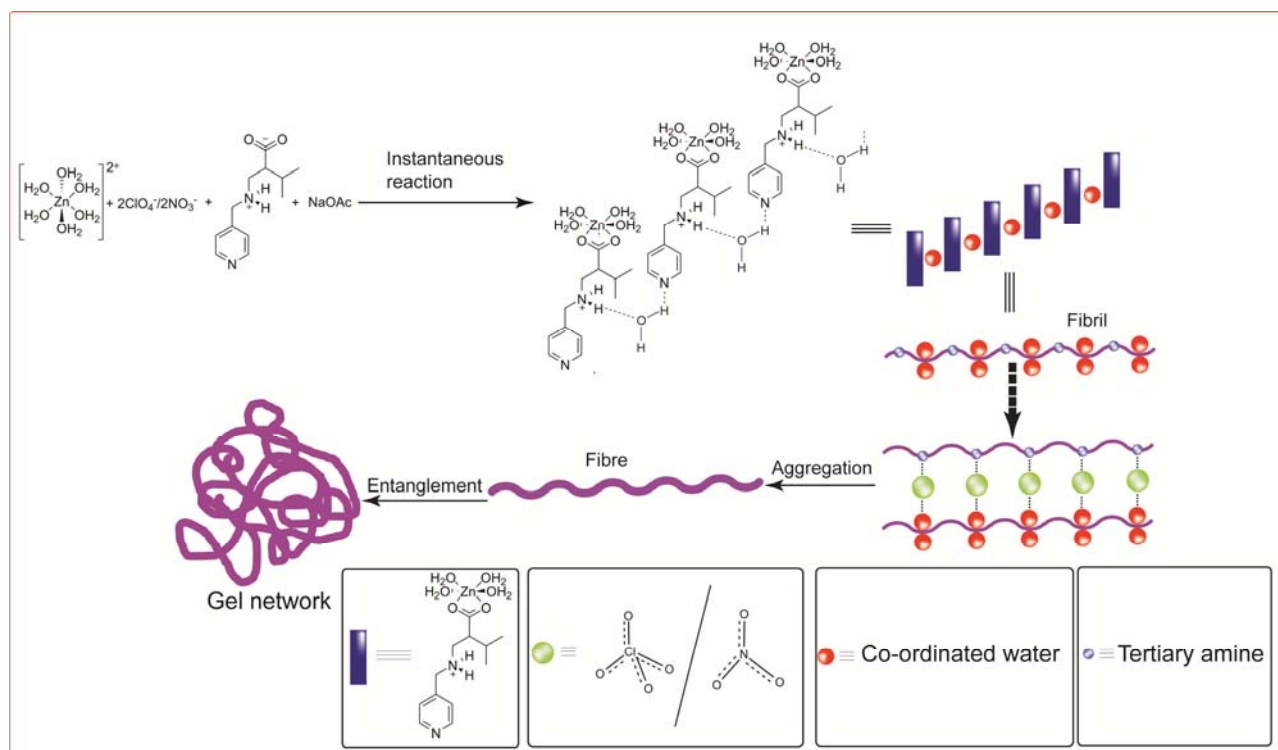

**Figure S8.** Plausible mechanism of formation of the gelator complex and subsequent formation of supramolecular aggregate.

### S8. TEM images

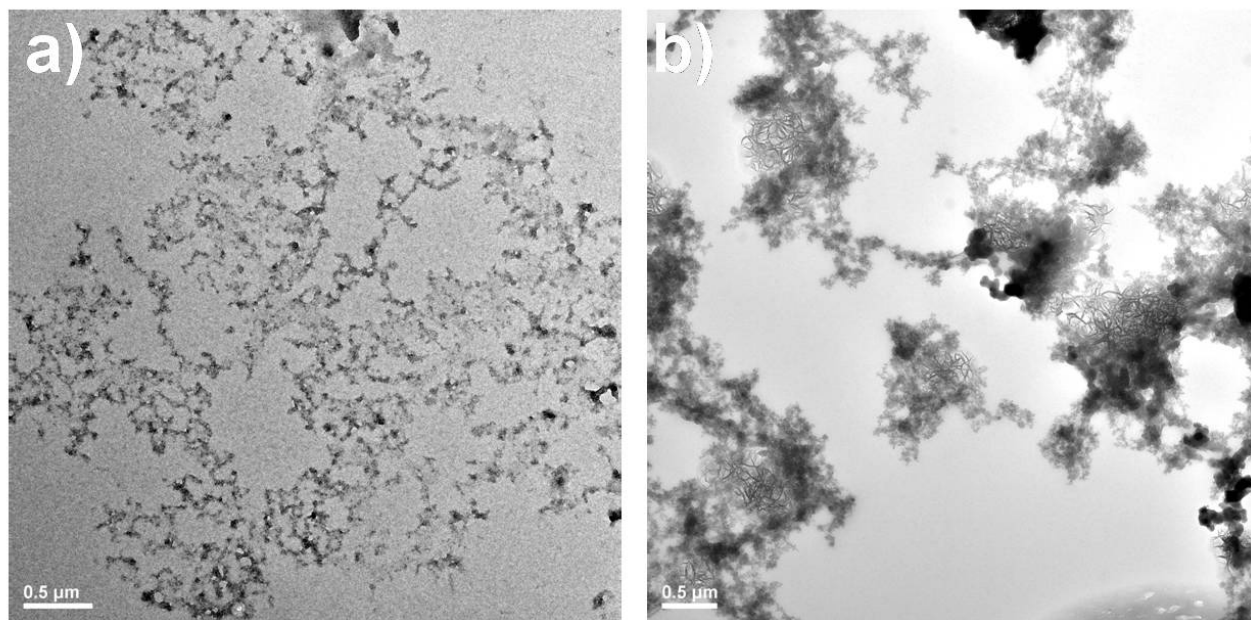

**Figure S9.** TEM images of a) opaque and b) and transparent ZPVA metallohydrogels.
